## Correction: MMTV-NeuT/ATTAC mice: a new model for studying the stromal tumor microenvironment

Hongyan Yuan<sup>1</sup>, Xiaoyi Wang<sup>1</sup>, Jin Lu<sup>1</sup>, Qiongsi Zhang<sup>1</sup>, Irina Brandina<sup>2</sup>, Ilya Alexandrov<sup>2</sup> and Robert I. Glazer<sup>1</sup>

<sup>1</sup> Department of Oncology, Lombardi Comprehensive Cancer Center, Georgetown University Medical Center, Washington, DC 20007, USA

<sup>2</sup> ActivSignal, LLC, Natick, MA 01760, USA

**Published:** December 28, 2018

**Copyright:** Yuan et al. This is an open-access article distributed under the terms of the Creative Commons Attribution License 3.0 (CC BY 3.0), which permits unrestricted use, distribution, and reproduction in any medium, provided the original author and source are credited.

**This article has been corrected:** Due to a labeling error, the legends for Figures 2 and 3 were accidentally switched. The proper figure legends are given below. The authors declare that these corrections do not change the results or conclusions of this paper.

**Figure 2: Induction of fibrosis in the mammary gland of NeuT/ATTAC mice following AP21087 treatment for four weeks.** Six-week-old NeuT/ATTAC mice were injected i.p. with vehicle (*NeuT/ATTAC*) or 0.4 mg/kg AP21087 (*NeuT/ATTAC+AP*) for four weeks. FFPE sections were stained as described in Figure 2. Magnification 400×.

**Figure 3: Induction of fibrosis in NeuT/ATTAC mice.** Mice at 6 weeks-of-age were injected i.p. with vehicle (*NeuT/ATTAC*) three times weekly for 5.5 months (*NeuT/ATTAC*) or with 0.4 mg/kg AP21087 (*NeuT/ATTAC+AP*) for 4 months. FFPE sections were stained with H&E, for collagen (PicroSirius Red) and with antibodies against Ki-67, CD31,  $\alpha$ -smooth muscle actin (SMA), F4/80, Cxcl1, Foxp3, CD8 and PD-L1. Magnification 400×.

Original article: Oncotarget. 2018; 9:8042-8053. <https://doi.org/10.18632/oncotarget.24233>
